# Supplementary material for: Preparation of mechanically stable triple-layer interference broadband antireflective coatings with self-cleaning property by sol–gel technique
Source: Royal Society of Chemistry journal article supplement (doi:10.1039/c7ra00844a), 2017-01-01
Supplement: c7ra00844a1.pdf [file c7ra00844a1.pdf]

Supplementary Information for

**Preparation of mechanically stable triple-layer interference broadband antireflective coatings  
with self-cleaning property by sol-gel technique**

*Yuanyang Li<sup>a</sup>, Ke Yang<sup>b</sup>, Bibo Xia<sup>a</sup>, Bowen Yang<sup>a</sup>, Lianghong Yan<sup>b</sup>, Meiyong He<sup>a</sup>, Hongwei Yan<sup>b,\*</sup>,  
Bo Jiang<sup>a,\*</sup>*

*a Key Laboratory of Green Chemistry & Technology, College of Chemistry, Sichuan University,  
Chengdu, 610064, China. E-mail: jiangbo@scu.edu.cn*

*b Research Center of Laser Fusion, China Academy of Engineering Physics, Mianyang, 621900,  
China. E-mail: hwyang@163.com*

*Study of films' chemical composition and degree of condensation by FT-IR spectral analysis*

As shown in figure S1, the SiO<sub>2</sub> film and the SiO<sub>2</sub>-TiO<sub>2</sub> composite film have two absorption bands at 1060 and 791 cm<sup>-1</sup> that are typical of silica from the sol-gel process. These bands are attributed to the Si-O-Si asymmetric stretching and symmetric stretching absorption bands, respectively. The two samples also exhibited an absorption band near 953 cm<sup>-1</sup>, which is assigned to Si-OH or Si-O-C groups. The band at 1164 cm<sup>-1</sup> corresponding to the C-H bending vibration, indicates the presence of -OC<sub>2</sub>H<sub>5</sub> groups. The broad bands between 400 and 800 cm<sup>-1</sup> associating with Ti-O-Ti network are distinct in TiO<sub>2</sub> film. The O-H stretching vibration absorption band at 3400 cm<sup>-1</sup> is observed in the spectra of all samples. This peak is attributed to -OH and the adsorbed H<sub>2</sub>O. Besides, an O-H bending vibration of water molecule is also observed at 1630 cm<sup>-1</sup> as KBr salt tablets are easy to absorb water.

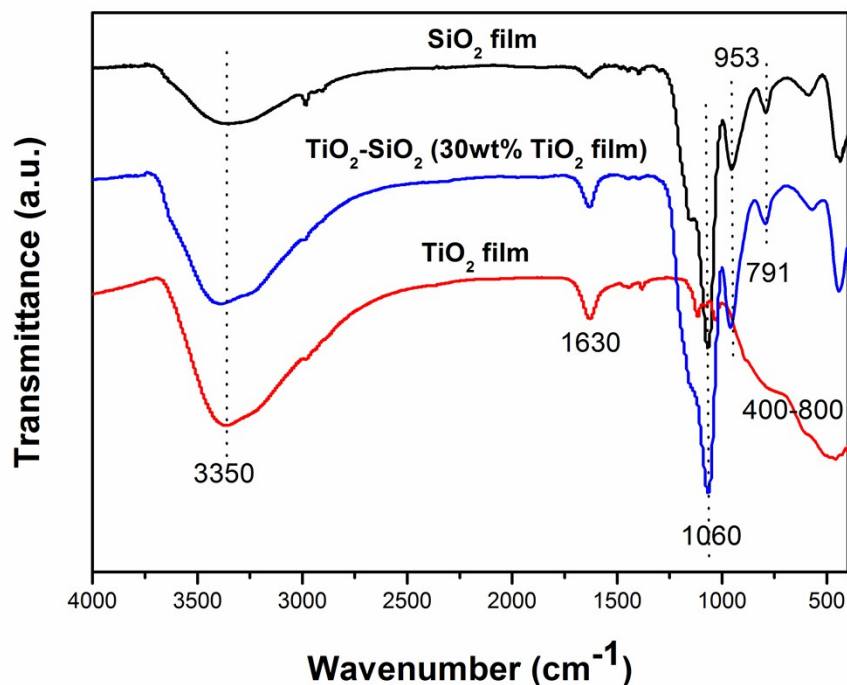

Figure S1 FTIR spectra of SiO<sub>2</sub> film, SiO<sub>2</sub>-TiO<sub>2</sub> composite film and TiO<sub>2</sub> film in the regime of 4000-400 cm<sup>-1</sup>.

The condensation process of SiO<sub>2</sub> is the Si-OH or Si-OR groups to form siloxane groups (Si-O-Si). Ratio of integrated intensity of Si-O-Si to Si-OH peaks at positions 1060 cm<sup>-1</sup> and 953 cm<sup>-1</sup> can indicate the degree of condensation<sup>1</sup>.

Figure S2 shows the Gaussian peak fitting of the FTIR spectra for acid-catalyzed SiO<sub>2</sub> film; individual peaks were resolved for relative intensity calculation. After resolving individual peaks, the area under the peak was calculated toward their integrated intensity. Ratio of integrated intensity of Si-O-Si to Si-OH peaks at positions 1060 cm<sup>-1</sup> and 953 cm<sup>-1</sup> was calculated. Calculated ratio was found to be 2.9. In the case of base-catalyzed silica, the ratio is larger (4.9, figure S3). The relative increase in the peak integrated intensity ratio of base-catalyzed SiO<sub>2</sub> film shows an increase in formation of Si-O-Si. In other words, the degree of condensation for acid-catalyzed SiO<sub>2</sub> film is much lower than

base-catalyzed SiO<sub>2</sub> film.

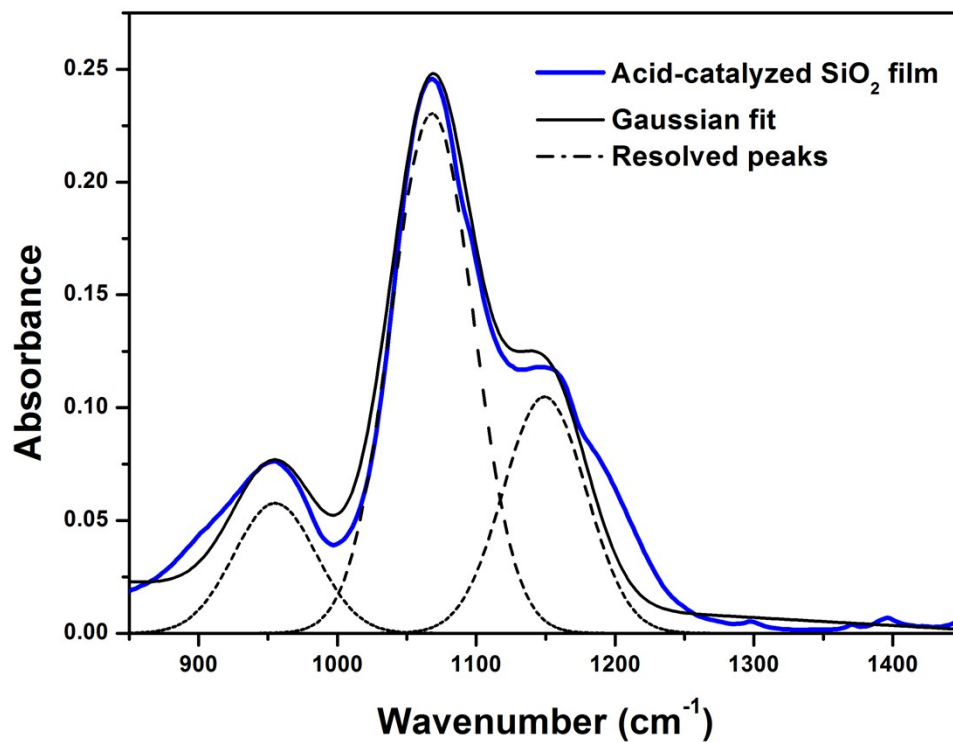

Figure S2. Gaussian peak fitting of the FTIR spectra for acid-catalyzed SiO<sub>2</sub> coating; individual peaks were resolved.

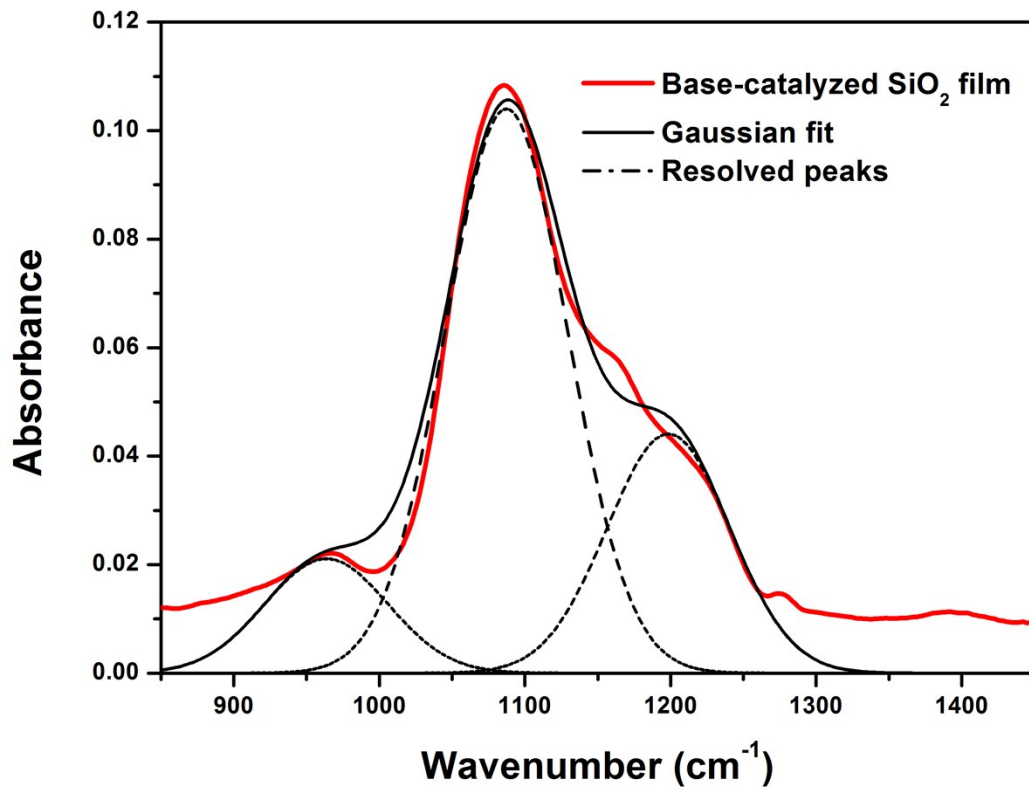

Figure S3. Gaussian peak fitting of the FTIR spectra for base-catalyzed SiO<sub>2</sub> coating; individual peaks were resolved.

*Particle size and its distribution of acid- and base-catalyzed SiO<sub>2</sub> and TiO<sub>2</sub> sols*

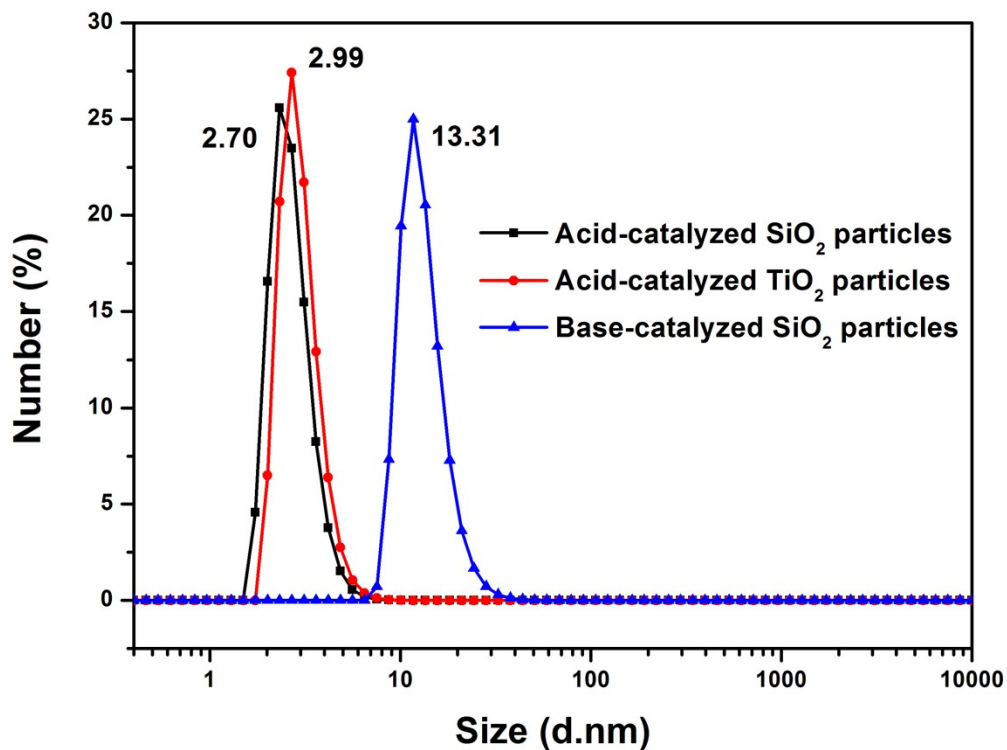

Figure S4. Particle size and its distribution of acid-catalyzed SiO<sub>2</sub> sol, base-catalyzed SiO<sub>2</sub> sol and TiO<sub>2</sub> sol

Their PDI (polydispersity index) values are 0.38, 0.37 and 0.26 for acid-catalyzed SiO<sub>2</sub>, TiO<sub>2</sub> and base-catalyzed SiO<sub>2</sub> samples, respectively. According to the Malvern specification, samples with PDI  $\approx$  0.2 are considered to be monodisperse. These results indicate that these sols are all monodisperse.

*Study of the crystal structure of TiO<sub>2</sub> by XRD*

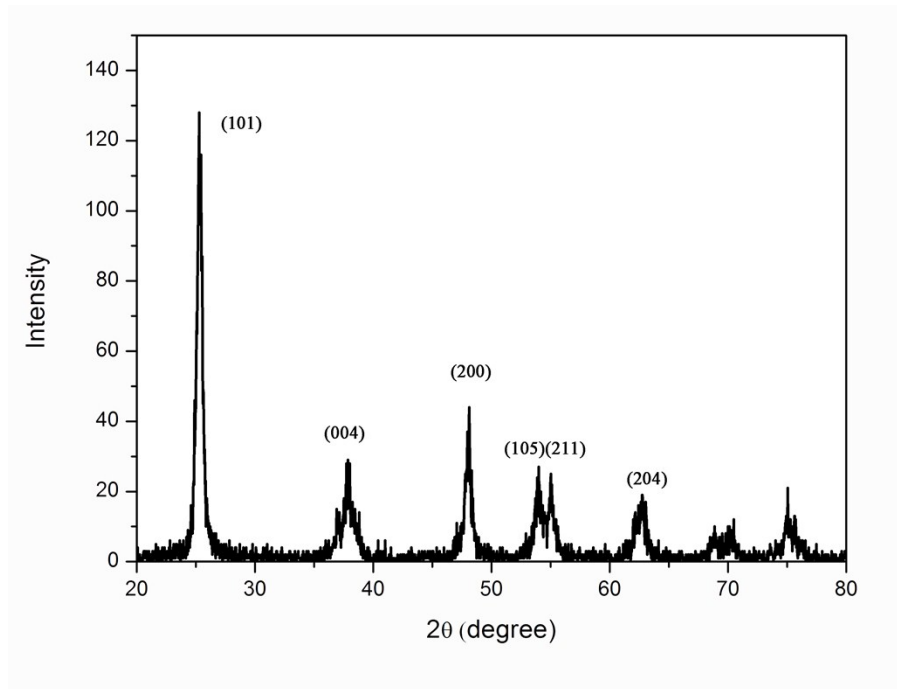

Figure S5. XRD patterns of  $\text{TiO}_2$  powder after calcination for 2h at  $400^\circ\text{C}$ .

*Anti-fogging property of the triple-layer film*

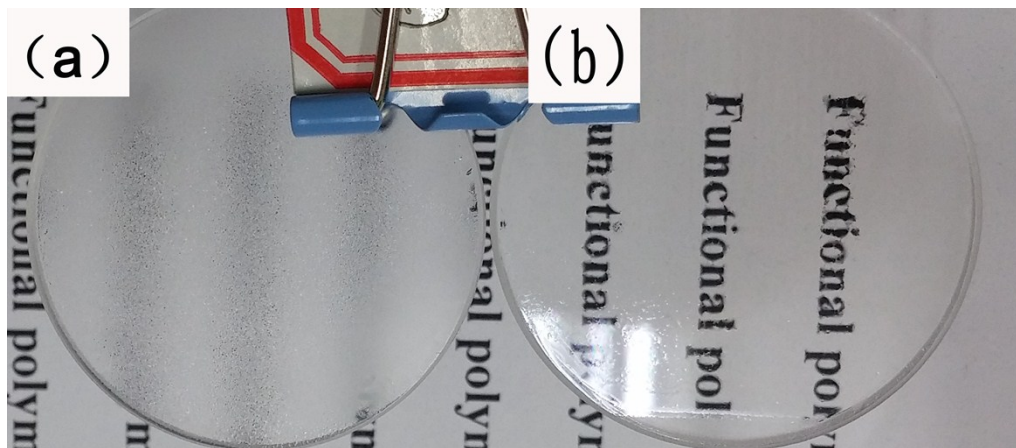

Figure S6. Digital image exhibiting antifogging properties of (a) uncoated and (b) the triple-layer film coated glass substrates.

1. A. Vincent, S. Babu, E. Brinley, A. Karakoti, S. Deshpande and S. Seal, *J Phys Chem C*, 2007, **111**, 8291-8298.
